# Supplementary material
Source: publisher figshare collection journal article supplement (https://tandf.figshare.com/ndownloader/files/38663286)
Supplement: Supplementary file 1 [file 38663286]

922 Supplementary Table 1:

923 Determinants of health and wellbeing affected by the policy areas of Brexit, COVID-19 and Climate Change: Examples of Employment and

924 health behaviour

| Determinant of health and wellbeing | COVID-19                                                                                               |                                                                                                                                | Brexit                                                                                         |                                                                                                                                                                                                                                                               | Climate Change                                                                                                                                                                                                                                                                                 |                                                                                                                                                                                                                                                                              |
|-------------------------------------|--------------------------------------------------------------------------------------------------------|--------------------------------------------------------------------------------------------------------------------------------|------------------------------------------------------------------------------------------------|---------------------------------------------------------------------------------------------------------------------------------------------------------------------------------------------------------------------------------------------------------------|------------------------------------------------------------------------------------------------------------------------------------------------------------------------------------------------------------------------------------------------------------------------------------------------|------------------------------------------------------------------------------------------------------------------------------------------------------------------------------------------------------------------------------------------------------------------------------|
|                                     | Positive<br>✓                                                                                          | Negative<br>✗                                                                                                                  | Positive<br>✓                                                                                  | Negative<br>✗                                                                                                                                                                                                                                                 | Positive<br>✓                                                                                                                                                                                                                                                                                  | Negative<br>✗                                                                                                                                                                                                                                                                |
| Employment                          | Growth of online retailers and employment protection schemes such as 'Furlough'. Rise in 'staycations' | Impact on sectors closed down to contain the transmission of the virus including hospitality, leisure and non-essential retail | Increase in job opportunities for young and older people due to immigration regulation changes | Loss of access to economic structural funds. Impact on economy in relation to immigration changes and content of Free Trade Agreements.<br><br>Loss of critical workers in key sectors such as hospitality, agriculture and HGV drivers leading to shortages. | Investment in 'green economy' and decarbonisation<br><br>Focus on the development of Local Foundational Economies and a switch to digital methods and home and agile working thus reducing need to commute<br><br>Investment in zero carbon measure e.g. electric vehicles<br>Industry and key | Investment in 'green economy' and decarbonisation. - Could lead to unemployment in some industries<br><br>Disruption from extreme weather with essential Infrastructure vulnerable.<br><br>Vulnerable areas and employment sectors; Coastal / fishing, agriculture transport |

|                                                                          |                                                                                                                                                                                                                                              |                                                                                                                                                                                                                                                                                                                                               |                                                                                                                                                                                                                                            |                                                                                                                                                                                                                                                                                        | areas of government decarbonise                                                                                                                                                                                                                                                                                                                                                                                                |                                                                                                                                                                                                                                                                                                                                                                                                                                                              |
|--------------------------------------------------------------------------|----------------------------------------------------------------------------------------------------------------------------------------------------------------------------------------------------------------------------------------------|-----------------------------------------------------------------------------------------------------------------------------------------------------------------------------------------------------------------------------------------------------------------------------------------------------------------------------------------------|--------------------------------------------------------------------------------------------------------------------------------------------------------------------------------------------------------------------------------------------|----------------------------------------------------------------------------------------------------------------------------------------------------------------------------------------------------------------------------------------------------------------------------------------|--------------------------------------------------------------------------------------------------------------------------------------------------------------------------------------------------------------------------------------------------------------------------------------------------------------------------------------------------------------------------------------------------------------------------------|--------------------------------------------------------------------------------------------------------------------------------------------------------------------------------------------------------------------------------------------------------------------------------------------------------------------------------------------------------------------------------------------------------------------------------------------------------------|
| Health Behaviours including diet, alcohol, smoking and physical activity | <p>More opportunities for physical activity near the home</p> <p>Increase in home-cooked meals in place of restaurant/take-out meals</p> <p>More people are aware of the importance of a healthy lifestyle due to the risks of Covid-19.</p> | <p>Increased home working could lead to a reduction in physical activity levels and more sedentary behaviour.</p> <p>Reduced physical activity owing to closure of leisure facilities/recreational sporting facilities</p> <p>Possible increase in home consumption of alcohol</p> <p>Increased snacking and impact on diet and nutrition</p> | <p>Potential for strengthening public health messages for tobacco, alcohol and food labelling – highly dependent on content of Free Trade Agreements</p> <p>Possible opportunities for growing local produce due to gaps in the market</p> | <p>Risk of tobacco, food and alcohol regulations and labelling diminishing and being amended once outside of EU law</p> <p>Risk of lower alcohol prices (dependent on trade deals)</p> <p>Risk of higher food prices, especially for healthy food, possibly leading to poor diets.</p> | <p>Promotion of green environment may increase participation in physical activity (walking, cycling)</p> <p>Warmer climate may enable more outdoor activity</p> <p>Investment in green infrastructure may increase physical activity (cycling, walking routes) through active travel</p> <p>Covid-19 risks could potentially encourage people to lead healthier lifestyles, including active travel and physical activity.</p> | <p>Climate may become too warm for sustained physical activity in summer months – risk of extreme weather events</p> <p>Flooding may affect active travel infrastructure</p> <p>Winter extreme weather events may prevent physical activity outdoors</p> <p>Heat events and hot weather can lead to an increase in alcohol intake and resultant increase in accidents and Violence Against Women, Domestic Abuse and Sexual Violence (VAWDASV) incidents</p> |

|  |  |  |  |  |                                                                                                                                                                                                                                                                                                                                                                                         |                                                                                                                                                                     |
|--|--|--|--|--|-----------------------------------------------------------------------------------------------------------------------------------------------------------------------------------------------------------------------------------------------------------------------------------------------------------------------------------------------------------------------------------------|---------------------------------------------------------------------------------------------------------------------------------------------------------------------|
|  |  |  |  |  | <p>Better work life balance due to agile working providing more opportunity for physical activity.</p> <p>Improved air quality from reduction in transport emissions (due to Covid-19 restrictions) could encourage more people to engage in outdoor physical activity and active travel</p> <p>Health benefits in a shift to more sustainable plant based and locally sourced diet</p> | <p>A shift to more sustainable plant based diet may not necessarily be a healthier diet.</p> <p>Increased stress or outdoor lifestyle may increase alcohol use.</p> |
|--|--|--|--|--|-----------------------------------------------------------------------------------------------------------------------------------------------------------------------------------------------------------------------------------------------------------------------------------------------------------------------------------------------------------------------------------------|---------------------------------------------------------------------------------------------------------------------------------------------------------------------|

925

926

927
